# Supplementary material for: Thoughts and expectations of young professionals about the European Federation of Clinical Chemistry and Laboratory Medicine (EFLM)
Source: publisher site journal article supplement (doi:10.1515/cclm-2020-0717), 2020-07-06

# EFLM questionnaire for Young Scientists

This is a short questionnaire to know your opinion and expectations about the involvement of young scientists in the activities of the European Federation of Laboratory Medicine (EFLM). It would be very helpful for us if you could reply to it and give us your feedback about any suggestion you may have. It will take about 5 minutes.

You can win a free registration for the 3rd EFLM Strategic Conference Demand Management in Zagreb (November 2020). A random drawing for the grant will be conducted among participants.

Thank you so much in advance

\* Required

Country residence \*

Your answer

Date of birth \*

Date

dd/mm/yyyy

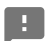

Category \*

- Resident
- Specialist
- Student
- PhD
- Other:

1. To get started, how much do you know about EFLM and its activities? \*

|                |                       |                       |                       |                       |                       |              |
|----------------|-----------------------|-----------------------|-----------------------|-----------------------|-----------------------|--------------|
|                | 1                     | 2                     | 3                     | 4                     | 5                     |              |
| I know nothing | <input type="radio"/> | I know a lot |

2. What do you think about the current level of involvement of YS in EFLM? \*

|          |                       |                       |                       |                       |                       |           |
|----------|-----------------------|-----------------------|-----------------------|-----------------------|-----------------------|-----------|
|          | 1                     | 2                     | 3                     | 4                     | 5                     |           |
| very low | <input type="radio"/> | very high |



3. What do you like about EFLM? (select all that apply) \*

- Organization
- Publications
- Courses
- Conferences
- Webinars
- Working groups
- Scientific publications (guidelines, articles...)
- Bursary programs
- Awards
- Congress and scientific meetings

4. What don't you like about EFLM?

Your answer

5. Do you think there is a need for a network of YS in the EFLM? \*

- Yes
- No

6. If yes, what degree of commitment are you able to have with this initiative?

|          |                       |                       |                       |                       |                       |           |
|----------|-----------------------|-----------------------|-----------------------|-----------------------|-----------------------|-----------|
|          | 1                     | 2                     | 3                     | 4                     | 5                     |           |
| very low | <input type="radio"/> | very high |



7. If yes, which kind of network would you suggest? (select all that apply)

- Working group
- Email distribution list
- National representatives
- Young Scientist meetings
- Other:

8. If yes, what would be the purpose and scope of activities for this network?

Your answer

9. How do you get the news about the EFLM activities? \*

- EFLM e-mail circulation list (subscription on <https://www.eflm.eu>)
- EuroLabNews or similar newsletter
- Through my National Society
- I don't get any information about EFLM activities
- Other:



10. Please, rate your degree of agreement with these observations: \*

|                                                                                  | Strongly disagree     | Disagree              | Agree                 | Strongly agree        |
|----------------------------------------------------------------------------------|-----------------------|-----------------------|-----------------------|-----------------------|
| It is easy for YS to get involved with EFLM                                      | <input type="radio"/> | <input type="radio"/> | <input type="radio"/> | <input type="radio"/> |
| I visit the EFLM website to stay up to date with topics related to my profession | <input type="radio"/> | <input type="radio"/> | <input type="radio"/> | <input type="radio"/> |
| The information on the EFLM website is useful for my daily practice              | <input type="radio"/> | <input type="radio"/> | <input type="radio"/> | <input type="radio"/> |
| I have attended activities organized by EFLM (congress, courses, webinars...)    | <input type="radio"/> | <input type="radio"/> | <input type="radio"/> | <input type="radio"/> |
| The EFLM should help more in the early stages of a YS's career                   | <input type="radio"/> | <input type="radio"/> | <input type="radio"/> | <input type="radio"/> |
| I wish my National Society told me more about EFLM activities                    | <input type="radio"/> | <input type="radio"/> | <input type="radio"/> | <input type="radio"/> |
| I wish EFLM promoted networking and scientific exchange between young scientists | <input type="radio"/> | <input type="radio"/> | <input type="radio"/> | <input type="radio"/> |



11. What types of activities would you like to be actively engaged in? (select all that apply) \*

- Working Group / Task Force Group
- Courses and conferences
- Blog posts
- Conference abstract review
- Virtual mentorship program
- Journal Club
- Summer/Winter schools
- Short educational courses (online/offline)
- Other:

12. What types of opportunities would you like to be offered by EFLM?

Your answer

13. Have you attended scientific events provided by EFLM? if yes, please state which ones

Your answer

14. Would you welcome (and attend) a program for formal scientific training (e.g. 2 days full-time) during an EFLM conference? \*

- Yes
- No



15. If yes, would you be willing to pay a registration for it?

- Yes
- No

16. Which skills would you be interested in? \*

- Biochemistry
- Flow citometry
- Mass spectrometry
- Molecular techniques
- Cardiac pathology
- Metrology
- Artificial intelligence and Big Data
- Robotics
- Other:

17. Do you know the Scientific Exchange Programme (EFLMLabX) \*

- Yes
- No

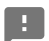

18. If yes, did you find any difficulties with this initiative?

- Troubles in the laboratory of origin
- Economic limitations
- No place that offered the scientific topic that you are interested in
- Other:

Please give us your email if you want to be updated about new projects of young scientist community

Your answer

Submit

Never submit passwords through Google Forms.

This content is neither created nor endorsed by Google. [Report Abuse](#) - [Terms of Service](#) - [Privacy Policy](#).

Google Forms



Supplement: Supplementary file 1 [file j_cclm-2020-0717_suppl.pdf]
